# Supplementary material for: Comparison of the GLIM, ESPEN and ICD-10 Criteria to Diagnose Malnutrition and Predict 30-Day Outcomes: An Observational Study in an Oncology Population
Source: MDPI journal article supplement (doi:10.3390/nu13082602), 2021-07-28
Supplement: s1 [file s1]

**Supplementary Table S1: Diagnostic measures by ICD-10, ESPEN and GLIM**

| GLIM <sup>(c)</sup>                                                                                                                                                                                                                                                                                                                                                                                                                                                                                                                                                                                                                               | ESPEN                                                                                                                                                                                                                                                                                                                                                                                  | ICD-10                                                                                                                                                                                                                                                                                                                                             |
|---------------------------------------------------------------------------------------------------------------------------------------------------------------------------------------------------------------------------------------------------------------------------------------------------------------------------------------------------------------------------------------------------------------------------------------------------------------------------------------------------------------------------------------------------------------------------------------------------------------------------------------------------|----------------------------------------------------------------------------------------------------------------------------------------------------------------------------------------------------------------------------------------------------------------------------------------------------------------------------------------------------------------------------------------|----------------------------------------------------------------------------------------------------------------------------------------------------------------------------------------------------------------------------------------------------------------------------------------------------------------------------------------------------|
| <p><b>PHENOTYPIC CRITERIA</b></p> <p>Low BMI (kg/m<sup>2</sup>)<br/>&lt;20 kg/m<sup>2</sup> (&lt;70 years)<br/><i>OR</i><br/>&lt;22 kg/m<sup>2</sup> (≥70 years)</p> <p>Unintentional loss of weight<br/>&gt;5%, ≤3 months<br/><i>OR</i><br/>&gt;10%, ≥4 months</p> <p>Reduced muscle mass <sup>(d)</sup><br/>(≥ 4 muscle sites rated as mild/moderate/severe deficit)</p> <p><b>ETIOLOGICAL CRITERIA</b></p> <p>Reduced food intake<br/>≤50% usual intake for 5-30 days<br/>or ≥1month<br/>or<br/>≤75% usual intake for ≥1 month<br/>or<br/>&gt;75% usual intake for ≥1 month</p> <p>Inflammation/ disease burden<br/>Presence of metastasis</p> | <p><b>OPTION ONE</b></p> <p>Low BMI (kg/m<sup>2</sup>)<br/>&lt;18.5 kg/m<sup>2</sup></p> <p><b>OPTION TWO</b></p> <p>Unintentional loss of weight <sup>(b)</sup><br/>&gt; 5% within 3 months<br/><i>OR</i><br/>&gt;10% indefinite of time</p> <p>Reduced BMI (kg/m<sup>2</sup>)<br/>&lt; 20 kg/m<sup>2</sup> (&lt;70 years)<br/><i>OR</i><br/>&lt; 22 kg/m<sup>2</sup> (≥70 years)</p> | <p><b>OPTION ONE</b></p> <p>Low BMI (kg/m<sup>2</sup>)<br/>&lt;18.5 kg/m<sup>2</sup></p> <p><b>OPTION TWO <sup>(a)</sup></b></p> <p>Unintentional loss of weight<br/>&gt;5% indefinite of time</p> <p>Reduced food intake<br/>Any suboptimal intake of food</p> <p>Muscle wasting<br/>(≥ 4 muscle sites rated as mild/moderate/severe deficit)</p> |

Abbreviations: ICD-10, International classification of disease version 10 malnutrition criteria; ESPEN, European Society of Clinical Nutrition and Metabolism malnutrition criteria; GLIM, Global Leadership Initiative on Malnutrition criteria; BMI, body mass index. (a) Meet all of the following, (b) Combined unintentional weight and low BMI, (c) 1 phenotypic criterion and 1 etiological criterion needs to be present for diagnosis, (d) by a validated assessment method.

**Supplementary Table S2: Additional details for each of the logistic regression models reported in****Table 4**

|                                                      | Cox and Snell<br>Nagelkerke R squared | Correctly classified/<br>total # of participants<br>(%) of the model | Full model                                         |
|------------------------------------------------------|---------------------------------------|----------------------------------------------------------------------|----------------------------------------------------|
| <b>Mortality at 30-days</b>                          |                                       |                                                                      |                                                    |
| <b>GLIM</b>                                          |                                       |                                                                      |                                                    |
| Patient type                                         |                                       |                                                                      |                                                    |
| Metastasis                                           |                                       |                                                                      |                                                    |
| Constant                                             | 0.056-0.237                           | 2154/2221 (97.0%)                                                    | $\chi^2$ (3, n=2221) = 128.60,<br>$p \leq 0.001$   |
| <b>ESPEN</b>                                         |                                       |                                                                      |                                                    |
| Patient type                                         |                                       |                                                                      |                                                    |
| Metastasis                                           |                                       |                                                                      |                                                    |
| Constant                                             | 0.060 – 0.234                         | 2207/2285 (96.6%)                                                    | $\chi^2$ (3, n=2284) = 141.79,<br>$p \leq 0.001$   |
| <b>ICD-10</b>                                        |                                       |                                                                      |                                                    |
| Patient type                                         |                                       |                                                                      |                                                    |
| Metastasis                                           |                                       |                                                                      |                                                    |
| Constant                                             | 0.048-0.209                           | 2154/2219 (97.1%)                                                    | $\chi^2$ (3, n = 2219) = 109.16,<br>$p \leq 0.001$ |
| <b>Unplanned admission or readmission at 30-days</b> |                                       |                                                                      |                                                    |
| <b>GLIM</b>                                          |                                       |                                                                      |                                                    |
| Patient type                                         |                                       |                                                                      |                                                    |
| Metastasis                                           |                                       |                                                                      |                                                    |
| Constant                                             | 0.029-0.052                           | 1868/2168 (86.2%)                                                    | $\chi^2$ (3, n=2168) = 63.22,<br>$p \leq 0.001$    |
| <b>ICD-10</b>                                        |                                       |                                                                      |                                                    |
| Patient type                                         |                                       |                                                                      |                                                    |
| Metastasis                                           |                                       |                                                                      |                                                    |
| Constant                                             | 0.026 – 0.047                         | 1865/2164 (86.2%)                                                    | $\chi^2$ (3, n=2164) = 57.43, $p \leq 0.001$       |
| <b>ESPEN</b>                                         |                                       |                                                                      |                                                    |
| Patient type                                         |                                       |                                                                      |                                                    |
| Metastasis                                           |                                       |                                                                      |                                                    |
| Constant                                             | 0.023-0.041                           | 1911/2225 (85.9%)                                                    | $\chi^2$ (3, n=2225) = 51.93,<br>$p \leq 0.001$    |

Abbreviations: ICD-10, International classification of disease version 10 malnutrition criteria; ESPEN, European Society of Clinical Nutrition and Metabolism malnutrition criteria; GLIM, Global Leadership Initiative on Malnutrition criteria.
